# Supplementary material for: RETRACTED ARTICLE: Stay-at-home policy is a case of exception fallacy: an internet-based ecological study
Source: Springer Nature journal article supplement (doi:10.1038/s41598-021-84092-1), 2021-03-05
Supplement: 41598_2021_84092_MOESM1_ESM.pdf [file 41598_2021_84092_MOESM1_ESM.pdf]

**Table S1.** Comparison between 184 countries and regions displaying a significant association between the variation of number of deaths/million and the variation of the percentage of staying at home, after False Discovery Rate (FDR B-H) analysis. Intercept and the coef. isolation  $\beta_0$  and  $\beta_1$  are from the linear regression formula; Shapiro is the test for normality; white is the test for heteroskedasticity; LM is the Lagrange Multiplier test for autocorrelation, Reset is the Ramsey's RESET test for functional specification (all should have a p-value  $\geq 0.05$  for a valid comparison), Coit=the p-value of the Phillips-Perron test applied to the residual of the regression (for a valid comparison, p-value $<0.05$ ).

| Region A                    | Region B                    | intercept | coef_isol | P-value (RStudi Shapiro) | White | LM.test (autocor) | Reset | Coit  | P-value (by Python) | FDR B-H |
|-----------------------------|-----------------------------|-----------|-----------|--------------------------|-------|-------------------|-------|-------|---------------------|---------|
| Saudi Arabia                | Moldova                     | -0.053    | -0.480    | 0.000                    | 0.841 | 0.734             | 0.037 | 0.680 | 0.010               | 0.000   |
| State of Minas Gerais       | State of Espírito Santo     | -0.272    | 14.073    | 0.000                    | 0.358 | 0.331             | 0.702 | 0.013 | 0.010               | 0.000   |
| United Arab Emirates        | Sweden                      | 0.647     | -2.109    | 0.001                    | 0.035 | 0.094             | 0.210 | 0.002 | 0.010               | 0.001   |
| South Korea                 | Italy                       | 0.125     | 1.724     | 0.001                    | 0.002 | 0.499             | 0.512 | 0.031 | 0.021               | 0.001   |
| Turkey                      | Kuwait                      | 0.148     | 0.430     | 0.001                    | 0.156 | 0.020             | 0.100 | 0.027 | 0.070               | 0.001   |
| Turkey                      | Sweden                      | -0.096    | -1.526    | 0.002                    | 0.095 | 0.693             | 0.429 | 0.574 | 0.010               | 0.002   |
| Qatar                       | Moldova                     | -0.241    | -0.515    | 0.002                    | 0.726 | 0.734             | 0.901 | 0.488 | 0.010               | 0.002   |
| Sweden                      | Saudi Arabia                | -0.524    | -1.539    | 0.002                    | 0.037 | 0.835             | 0.477 | 0.226 | 0.010               | 0.002   |
| Kuwait                      | Australia                   | -0.030    | 0.311     | 0.002                    | 0.412 | 0.002             | 0.334 | 0.006 | 0.010               | 0.002   |
| Japan                       | Italy                       | -0.270    | 1.340     | 0.003                    | 0.026 | 0.411             | 0.467 | 0.319 | 0.017               | 0.003   |
| Kuwait                      | Greece                      | -0.076    | 0.302     | 0.003                    | 0.821 | 0.011             | 0.090 | 0.011 | 0.010               | 0.003   |
| Tokyo - JP                  | Italy                       | -0.437    | 1.345     | 0.004                    | 0.011 | 0.752             | 0.314 | 0.471 | 0.025               | 0.004   |
| Kuwait                      | Israel                      | -0.591    | 0.369     | 0.004                    | 0.085 | 0.957             | 0.943 | 0.074 | 0.021               | 0.004   |
| Saudi Arabia                | Oman                        | -0.095    | 0.327     | 0.004                    | 0.093 | 0.215             | 0.926 | 0.181 | 0.010               | 0.004   |
| Belarus                     | Australia                   | 0.023     | 0.117     | 0.004                    | 0.185 | 0.661             | 0.154 | 0.923 | 0.010               | 0.004   |
| Ukraine                     | Libya                       | -0.045    | 0.144     | 0.004                    | 0.020 | 0.000             | 0.392 | 0.002 | 0.010               | 0.004   |
| Turkey                      | Oman                        | -0.190    | 0.372     | 0.005                    | 0.620 | 0.353             | 0.206 | 0.225 | 0.010               | 0.005   |
| Sweden                      | Australia                   | -1.036    | -2.432    | 0.005                    | 0.073 | 0.852             | 0.477 | 0.197 | 0.010               | 0.005   |
| Sweden                      | Macedonia                   | -0.326    | -2.268    | 0.005                    | 0.332 | 0.893             | 0.322 | 0.174 | 0.010               | 0.005   |
| Saudi Arabia                | Qatar                       | 0.198     | -0.490    | 0.005                    | 0.968 | 0.757             | 0.014 | 0.730 | 0.010               | 0.005   |
| Switzerland                 | Colombia                    | -2.257    | -1.030    | 0.005                    | 0.016 | 0.899             | 0.083 | 0.103 | 0.082               | 0.005   |
| Libya                       | Israel                      | -0.322    | 0.262     | 0.005                    | 0.005 | 0.542             | 0.022 | 0.779 | 0.010               | 0.005   |
| State of Pará               | Kuwait                      | -0.228    | -2.315    | 0.005                    | 0.966 | 0.374             | 0.091 | 0.619 | 0.087               | 0.005   |
| Oman                        | Kuwait                      | 0.318     | 0.437     | 0.005                    | 0.671 | 0.076             | 0.002 | 0.248 | 0.010               | 0.005   |
| State of Roraima            | State of Amapá              | -0.628    | -4.023    | 0.005                    | 0.230 | 0.078             | 0.137 | 0.784 | 0.010               | 0.005   |
| Sweden                      | Romania                     | -0.509    | -1.922    | 0.005                    | 0.002 | 0.526             | 0.940 | 0.578 | 0.010               | 0.005   |
| State of Minas Gerais       | Kuwait                      | 1.037     | 0.451     | 0.006                    | 0.080 | 0.871             | 0.285 | 0.084 | 0.010               | 0.006   |
| State of Roraima            | State of Maranhão           | -0.310    | -3.548    | 0.006                    | 0.026 | 0.356             | 0.288 | 0.919 | 0.010               | 0.006   |
| Sweden                      | Qatar                       | -0.499    | -1.910    | 0.006                    | 0.028 | 0.692             | 0.830 | 0.437 | 0.010               | 0.006   |
| Romania                     | Finland                     | 0.664     | -0.684    | 0.006                    | 0.090 | 0.062             | 0.074 | 0.931 | 0.010               | 0.006   |
| Libya                       | Kuwait                      | 0.238     | 0.261     | 0.006                    | 0.251 | 0.012             | 0.674 | 0.001 | 0.010               | 0.006   |
| State of Amapá              | New York                    | 0.451     | 18.260    | 0.006                    | 0.038 | 0.075             | 0.070 | 0.237 | 0.052               | 0.006   |
| Netherlands                 | Colombia                    | -2.247    | -1.247    | 0.007                    | 0.000 | 0.937             | 0.095 | 0.795 | 0.060               | 0.007   |
| Kuwait                      | Japan                       | 0.067     | 0.198     | 0.007                    | 0.526 | 0.001             | 0.876 | 0.001 | 0.010               | 0.007   |
| State of Mato Grosso do Sul | State of Mato Grosso        | -0.974    | 5.249     | 0.007                    | 0.118 | 0.932             | 0.039 | 0.139 | 0.010               | 0.007   |
| Tokyo - JP                  | Japan                       | 0.013     | 0.221     | 0.007                    | 0.309 | 0.757             | 0.852 | 0.679 | 0.010               | 0.007   |
| Sweden                      | State of Roraima            | -1.016    | -3.702    | 0.007                    | 0.255 | 0.726             | 0.872 | 0.257 | 0.010               | 0.007   |
| Serbia                      | Kuwait                      | 0.187     | 0.330     | 0.008                    | 0.741 | 0.708             | 0.784 | 0.134 | 0.010               | 0.008   |
| Serbia                      | Netherlands                 | -0.201    | -1.445    | 0.008                    | 0.001 | 0.935             | 0.023 | 0.179 | 0.184               | 0.008   |
| Netherlands                 | Australia                   | -0.548    | -1.714    | 0.008                    | 0.000 | 0.000             | 0.001 | 0.000 | 0.338               | 0.008   |
| Ukraine                     | Sweden                      | -0.123    | -2.475    | 0.008                    | 0.001 | 0.550             | 0.816 | 0.391 | 0.010               | 0.008   |
| United Kingdom              | State of Alagoas            | -0.730    | 4.025     | 0.008                    | 0.157 | 0.802             | 0.171 | 0.132 | 0.031               | 0.008   |
| Ukraine                     | Kuwait                      | 0.197     | 0.304     | 0.008                    | 0.178 | 0.045             | 0.255 | 0.009 | 0.010               | 0.008   |
| Greece                      | Belarus                     | -0.064    | 0.115     | 0.008                    | 0.868 | 0.440             | 0.039 | 0.478 | 0.010               | 0.008   |
| State of Roraima            | Bahrain                     | -0.852    | -3.800    | 0.009                    | 0.060 | 0.691             | 0.497 | 0.153 | 0.010               | 0.009   |
| Slovenia                    | Luxembourg                  | 0.148     | 0.886     | 0.009                    | 0.384 | 0.338             | 0.257 | 0.867 | 0.037               | 0.009   |
| Kuwait                      | Bulgaria                    | -0.232    | 0.308     | 0.009                    | 0.266 | 0.028             | 0.022 | 0.009 | 0.010               | 0.009   |
| Germany                     | Australia                   | -0.349    | -0.595    | 0.010                    | 0.261 | 0.018             | 0.002 | 0.299 | 0.352               | 0.010   |
| State of Tocantins          | New York                    | -0.806    | 15.596    | 0.010                    | 0.068 | 0.008             | 0.023 | 0.033 | 0.083               | 0.010   |
| State of Rio Grande do Sul  | State of Paraná             | 0.208     | -2.941    | 0.010                    | 0.002 | 0.242             | 0.064 | 0.064 | 0.010               | 0.010   |
| State of Mato Grosso        | Belarus                     | 1.627     | 0.918     | 0.010                    | 0.286 | 0.683             | 0.467 | 0.290 | 0.024               | 0.010   |
| State of Pará               | Serbia                      | -0.295    | 2.095     | 0.011                    | 0.438 | 0.349             | 0.117 | 0.063 | 0.038               | 0.011   |
| South Korea                 | Belarus                     | -0.118    | 0.093     | 0.011                    | 0.778 | 0.675             | 0.160 | 0.432 | 0.010               | 0.011   |
| Sweden                      | Costa Rica                  | -1.394    | -1.514    | 0.011                    | 0.233 | 0.684             | 0.973 | 0.215 | 0.010               | 0.011   |
| State of Goiás              | Belarus                     | 2.455     | -0.502    | 0.011                    | 0.150 | 0.000             | 0.975 | 0.021 | 0.010               | 0.011   |
| Lebanon                     | Belarus                     | -0.010    | 0.105     | 0.011                    | 0.984 | 0.204             | 0.817 | 0.931 | 0.010               | 0.012   |
| Kuwait                      | Belarus                     | -0.083    | 0.200     | 0.011                    | 0.082 | 0.056             | 0.457 | 0.398 | 0.010               | 0.012   |
| Sweden                      | Canada                      | -0.328    | -2.068    | 0.012                    | 0.543 | 0.664             | 0.222 | 0.035 | 0.010               | 0.012   |
| United Kingdom              | State of Mato Grosso do Sul | -1.233    | 2.951     | 0.012                    | 0.008 | 0.422             | 0.217 | 0.132 | 0.022               | 0.012   |
| State of Roraima            | State of Pará               | -0.295    | -3.512    | 0.013                    | 0.166 | 0.318             | 0.855 | 0.839 | 0.010               | 0.013   |
| State of Rio Grande do Sul  | Belarus                     | 1.367     | -0.276    | 0.013                    | 0.783 | 0.169             | 0.128 | 0.874 | 0.029               | 0.013   |
| United Kingdom              | State of Amapá              | -0.826    | 4.568     | 0.013                    | 0.162 | 0.663             | 0.160 | 0.678 | 0.010               | 0.013   |
| State of Paraná             | Belarus                     | 0.689     | 0.336     | 0.014                    | 0.484 | 0.004             | 0.834 | 0.050 | 0.018               | 0.014   |
| South Korea                 | Kuwait                      | -0.023    | 0.223     | 0.014                    | 0.104 | 0.007             | 0.800 | 0.480 | 0.010               | 0.014   |
| Russia                      | Netherlands                 | -0.178    | -1.179    | 0.015                    | 0.004 | 0.011             | 0.000 | 0.009 | 0.545               | 0.015   |
| United Kingdom              | State of Mato Grosso        | -1.937    | 3.284     | 0.015                    | 0.030 | 0.938             | 0.701 | 0.440 | 0.010               | 0.015   |
| United Kingdom              | State of Tocantins          | -1.269    | 2.838     | 0.015                    | 0.010 | 0.962             | 0.257 | 0.211 | 0.022               | 0.015   |
| State of Roraima            | South Korea                 | 1.380     | -3.696    | 0.015                    | 0.028 | 0.884             | 0.353 | 0.177 | 0.010               | 0.015   |
| Netherlands                 | Canada                      | -0.115    | -2.739    | 0.016                    | 0.082 | 0.432             | 0.047 | 0.195 | 0.079               | 0.015   |
| State of Alagoas            | Greece                      | 0.467     | 0.698     | 0.016                    | 0.167 | 0.492             | 0.079 | 0.166 | 0.021               | 0.016   |
| State of São Paulo          | Belo Horizonte              | 0.026     | 4.021     | 0.016                    | 0.000 | 0.055             | 0.598 | 0.026 | 0.010               | 0.016   |
| Romania                     | Netherlands                 | 0.325     | -1.587    | 0.017                    | 0.001 | 0.848             | 0.003 | 0.180 | 0.247               | 0.017   |
| Ukraine                     | Finland                     | 0.191     | -0.715    | 0.017                    | 0.009 | 0.139             | 0.258 | 0.695 | 0.010               | 0.017   |
| Italy                       | Belarus                     | -0.181    | 1.199     | 0.017                    | 0.002 | 0.916             | 0.094 | 0.142 | 0.125               | 0.017   |
| Netherlands                 | Croatia                     | 0.253     | -1.575    | 0.017                    | 0.000 | 0.808             | 0.110 | 0.344 | 0.054               | 0.017   |
| Poland                      | Kuwait                      | 0.077     | 0.267     | 0.017                    | 0.162 | 0.016             | 0.762 | 0.002 | 0.010               | 0.017   |
| State of Roraima            | Finland                     | 1.330     | -2.812    | 0.018                    | 0.019 | 0.904             | 0.460 | 0.245 | 0.010               | 0.018   |
| State of Acre               | New York                    | -0.538    | 14.125    | 0.018                    | 0.052 | 0.104             | 0.016 | 0.299 | 0.125               | 0.018   |
| State of Alagoas            | Bosnia and Herzegovina      | -0.302    | 1.364     | 0.018                    | 0.526 | 0.902             | 0.318 | 0.145 | 0.010               | 0.018   |
| Turkey                      | State of Ceará              | 0.043     | 1.897     | 0.018                    | 0.868 | 0.391             | 0.261 | 0.018 | 0.010               | 0.018   |
| United Kingdom              | State of Piauí              | -0.577    | 3.626     | 0.019                    | 0.046 | 0.631             | 0.064 | 0.151 | 0.053               | 0.018   |
| Kuwait                      | Argentina                   | -0.788    | 0.326     | 0.019                    | 1.000 | 0.192             | 0.782 | 0.012 | 0.010               | 0.019   |
| Libya                       | Australia                   | 0.135     | 0.146     | 0.019                    | 0.057 | 0.211             | 0.015 | 0.826 | 0.010               | 0.019   |
| Portugal                    | Netherlands                 | 0.206     | -1.001    | 0.019                    | 0.000 | 0.887             | 0.050 | 0.372 | 0.126               | 0.019   |
| Sweden                      | Moldova                     | -0.339    | -1.947    | 0.019                    | 0.004 | 0.357             | 0.668 | 0.747 | 0.010               | 0.019   |
| State of Santa Catarina     | Belarus                     | 1.094     | 0.382     | 0.019                    | 0.335 | 0.027             | 0.548 | 0.051 | 0.018               | 0.019   |
| State of Roraima            | State of Acre               | -1.022    | -3.392    | 0.019                    | 0.844 | 0.113             | 0.056 | 0.945 | 0.010               | 0.019   |
| State of Mato Grosso do Sul | Kuwait                      | 1.604     | 0.498     | 0.019                    | 0.173 | 0.109             | 0.771 | 0.096 | 0.010               | 0.019   |
| Costa Rica                  | Austria                     | 0.665     | -0.334    | 0.019                    | 0.836 | 0.402             | 0.126 | 0.174 | 0.040               | 0.020   |
| State of Alagoas            | Croatia                     | 0.445     | 0.904     | 0.020                    | 0.167 | 0.756             | 0.261 | 0.173 | 0.011               | 0.020   |
| State of Sergipe            | Hungary                     | 0.890     | 1.841     | 0.020                    | 0.798 | 0.988             | 0.931 | 0.671 | 0.010               | 0.020   |
| United Kingdom              | State of Pará               | -0.567    | 4.336     | 0.021                    | 0.744 | 0.285             | 0.014 | 0.159 | 0.159               | 0.021   |
| Libya                       | Japan                       | 0.199     | 0.073     | 0.021                    | 0.000 | 0.144             | 0.711 | 0.245 | 0.010               | 0.021   |
| State of Roraima            | Chile                       | -1.408    | -2.313    | 0.022                    | 0.169 | 0.220             | 0.076 | 0.412 | 0.010               | 0.022   |

|                             |                              |        |        |       |       |       |       |       |       |       |       |
|-----------------------------|------------------------------|--------|--------|-------|-------|-------|-------|-------|-------|-------|-------|
| Slovenia                    | Czech Republic               | -0.017 | 0.352  | 0.022 | 0.025 | 0.921 | 0.017 | 0.455 | 0.010 | 0.022 | 0.022 |
| United Kingdom              | State of Sergipe             | -0.853 | 3.689  | 0.022 | 0.350 | 0.925 | 0.191 | 0.186 | 0.042 | 0.022 | 0.023 |
| Netherlands                 | Israel                       | -0.703 | -1.480 | 0.023 | 0.000 | 0.639 | 0.129 | 0.769 | 0.046 | 0.023 | 0.023 |
| Netherlands                 | Argentina                    | -1.550 | -1.418 | 0.023 | 0.000 | 0.442 | 0.044 | 0.395 | 0.092 | 0.023 | 0.023 |
| State of Alagoas            | Romania                      | -0.092 | 1.056  | 0.023 | 0.043 | 0.481 | 0.051 | 0.518 | 0.032 | 0.023 | 0.024 |
| United Kingdom              | State of Paraíba             | -1.209 | 3.576  | 0.023 | 0.128 | 0.919 | 0.264 | 0.210 | 0.023 | 0.023 | 0.024 |
| Romania                     | Kuwait                       | 0.577  | 0.299  | 0.025 | 0.925 | 0.422 | 0.727 | 0.042 | 0.010 | 0.025 | 0.025 |
| State of Mato Grosso do Sul | State of Alagoas             | 0.587  | 2.396  | 0.025 | 0.895 | 0.263 | 0.005 | 0.838 | 0.260 | 0.025 | 0.026 |
| Kuwait                      | Hungary                      | 0.034  | 0.318  | 0.025 | 0.071 | 0.000 | 0.978 | 0.001 | 0.010 | 0.025 | 0.026 |
| United Arab Emirates        | Netherlands                  | 0.205  | -1.126 | 0.025 | 0.009 | 0.491 | 0.002 | 0.032 | 0.312 | 0.025 | 0.026 |
| State of Paraná             | State of Goiás               | -1.006 | -3.485 | 0.025 | 0.004 | 0.001 | 0.001 | 0.000 | 0.010 | 0.025 | 0.026 |
| State of Roraima            | Kuwait                       | -0.383 | -2.374 | 0.025 | 0.012 | 0.926 | 0.268 | 0.588 | 0.010 | 0.025 | 0.026 |
| New York                    | Lebanon                      | -2.565 | 15.343 | 0.025 | 0.039 | 0.158 | 0.016 | 0.233 | 0.233 | 0.025 | 0.026 |
| Turkey                      | State of Tocantins           | -1.335 | 0.554  | 0.026 | 0.201 | 0.396 | 0.834 | 0.345 | 0.010 | 0.026 | 0.027 |
| State of Santa Catarina     | Belo Horizonte               | 0.092  | 1.512  | 0.026 | 0.049 | 0.223 | 0.084 | 0.203 | 0.010 | 0.026 | 0.027 |
| State of Tocantins          | Serbia                       | 1.194  | 0.644  | 0.026 | 0.411 | 0.467 | 0.483 | 0.831 | 0.010 | 0.026 | 0.027 |
| State of Amazonas           | Serbia                       | 0.158  | 2.444  | 0.026 | 0.061 | 0.003 | 0.787 | 0.357 | 0.010 | 0.026 | 0.027 |
| State of Roraima            | State of Pernambuco          | -0.774 | -2.903 | 0.026 | 0.084 | 0.308 | 0.069 | 0.891 | 0.010 | 0.026 | 0.027 |
| United Arab Emirates        | Kuwait                       | -0.041 | 0.357  | 0.026 | 0.005 | 0.001 | 0.187 | 0.000 | 0.010 | 0.026 | 0.027 |
| State of Rondônia           | Oman                         | 0.697  | 1.559  | 0.026 | 0.101 | 0.801 | 0.086 | 0.179 | 0.010 | 0.026 | 0.027 |
| New York                    | Czech Republic               | -4.305 | 15.358 | 0.027 | 0.005 | 0.213 | 0.017 | 0.198 | 0.214 | 0.027 | 0.028 |
| United Kingdom              | State of Santa Catarina      | -1.114 | 1.976  | 0.027 | 0.027 | 0.354 | 0.052 | 0.067 | 0.081 | 0.027 | 0.028 |
| New York                    | Netherlands                  | -1.370 | 13.971 | 0.027 | 0.001 | 0.407 | 0.079 | 0.726 | 0.080 | 0.027 | 0.028 |
| State of Paraná             | Federal District             | -2.985 | -2.389 | 0.028 | 0.602 | 0.002 | 0.023 | 0.050 | 0.010 | 0.028 | 0.029 |
| State of Sergipe            | State of Roraima             | 1.198  | -2.502 | 0.028 | 0.009 | 0.791 | 0.052 | 0.860 | 0.010 | 0.028 | 0.029 |
| State of Santa Catarina     | State of Espírito Santo      | -0.005 | 2.089  | 0.029 | 0.779 | 0.052 | 0.862 | 0.614 | 0.010 | 0.029 | 0.030 |
| Turkey                      | Libya                        | -0.164 | 0.182  | 0.029 | 0.239 | 0.468 | 0.007 | 0.467 | 0.191 | 0.029 | 0.030 |
| Switzerland                 | Serbia                       | -0.030 | -0.992 | 0.029 | 0.385 | 0.424 | 0.061 | 0.816 | 0.103 | 0.029 | 0.030 |
| State of Alagoas            | Serbia                       | 0.367  | 0.724  | 0.029 | 0.458 | 0.979 | 0.040 | 0.120 | 0.055 | 0.029 | 0.030 |
| State of Pernambuco         | Serbia                       | 0.105  | 1.465  | 0.029 | 0.482 | 0.777 | 0.114 | 0.585 | 0.010 | 0.029 | 0.030 |
| State of Pará               | Romania                      | -0.678 | 2.584  | 0.029 | 0.503 | 0.602 | 0.033 | 0.013 | 0.085 | 0.029 | 0.030 |
| Sweden                      | Russia                       | 0.081  | -1.412 | 0.030 | 0.006 | 0.239 | 0.433 | 0.239 | 0.010 | 0.030 | 0.031 |
| State of Sergipe            | State of Amapá               | -0.154 | 5.339  | 0.030 | 0.328 | 0.524 | 0.004 | 0.782 | 0.010 | 0.030 | 0.031 |
| Oman                        | Chile                        | 0.581  | 2.481  | 0.031 | 0.000 | 0.590 | 0.077 | 0.025 | 0.010 | 0.031 | 0.032 |
| South Korea                 | Greece                       | -0.054 | 0.067  | 0.031 | 0.157 | 0.951 | 0.063 | 0.324 | 0.010 | 0.031 | 0.032 |
| Lebanon                     | Kuwait                       | 0.093  | 0.283  | 0.031 | 0.054 | 0.021 | 0.096 | 0.167 | 0.010 | 0.031 | 0.032 |
| State of Roraima            | State of Paraíba             | -1.248 | -2.424 | 0.032 | 0.015 | 0.732 | 0.209 | 0.870 | 0.010 | 0.032 | 0.033 |
| State of Roraima            | State of Alagoas             | -0.470 | -2.616 | 0.032 | 0.030 | 0.572 | 0.076 | 0.753 | 0.010 | 0.032 | 0.033 |
| United Kingdom              | State of Bahia               | -0.943 | 3.032  | 0.032 | 0.002 | 0.470 | 0.036 | 0.112 | 0.088 | 0.032 | 0.033 |
| State of São Paulo          | State of Paraná              | 0.330  | 1.946  | 0.032 | 0.832 | 0.151 | 0.621 | 0.676 | 0.010 | 0.032 | 0.034 |
| State of Mato Grosso        | Qatar                        | 2.049  | 1.034  | 0.032 | 0.135 | 0.728 | 0.764 | 0.557 | 0.010 | 0.032 | 0.034 |
| New York                    | Bulgaria                     | -3.601 | 13.029 | 0.032 | 0.005 | 0.252 | 0.005 | 0.387 | 0.343 | 0.032 | 0.034 |
| United States               | Netherlands                  | 1.421  | -1.872 | 0.032 | 0.041 | 0.840 | 0.918 | 0.607 | 0.010 | 0.032 | 0.034 |
| Ukraine                     | State of Amapá               | 0.520  | 3.410  | 0.033 | 0.318 | 0.251 | 0.001 | 0.865 | 0.010 | 0.033 | 0.034 |
| State of Mato Grosso        | Hungary                      | 1.924  | 1.276  | 0.033 | 0.256 | 0.949 | 0.264 | 0.417 | 0.010 | 0.033 | 0.034 |
| State of Alagoas            | Israel                       | 0.094  | 0.593  | 0.033 | 0.161 | 0.918 | 0.024 | 0.280 | 0.046 | 0.033 | 0.034 |
| Sweden                      | Serbia                       | 0.038  | -1.383 | 0.033 | 0.197 | 0.921 | 0.565 | 0.598 | 0.010 | 0.033 | 0.034 |
| Kuwait                      | Czech Republic               | -0.061 | 0.279  | 0.033 | 0.714 | 0.001 | 0.833 | 0.011 | 0.010 | 0.033 | 0.034 |
| Turkey                      | State of Alagoas             | -0.514 | 0.583  | 0.034 | 0.261 | 0.341 | 0.006 | 0.638 | 0.127 | 0.034 | 0.035 |
| Moldova                     | Luxembourg                   | 0.504  | 0.884  | 0.034 | 0.546 | 0.658 | 0.861 | 0.480 | 0.010 | 0.034 | 0.036 |
| State of Pará               | State of Mato Grosso         | -1.303 | 4.673  | 0.035 | 0.673 | 0.620 | 0.506 | 0.245 | 0.023 | 0.035 | 0.037 |
| State of Sergipe            | New York                     | -0.696 | 14.131 | 0.036 | 0.011 | 0.219 | 0.007 | 0.228 | 0.191 | 0.036 | 0.037 |
| State of Paraná             | Belo Horizonte               | -0.378 | 2.345  | 0.036 | 0.021 | 0.517 | 0.016 | 0.589 | 0.010 | 0.036 | 0.037 |
| Romania                     | Berlin                       | 0.599  | 0.504  | 0.037 | 0.772 | 0.124 | 0.203 | 0.433 | 0.010 | 0.037 | 0.038 |
| State of Pará               | Bosnia and Herzegovina       | -0.876 | 2.634  | 0.037 | 0.631 | 0.647 | 0.100 | 0.103 | 0.049 | 0.037 | 0.039 |
| United Kingdom              | Bosnia and Herzegovina       | -1.447 | 2.753  | 0.037 | 0.030 | 0.019 | 0.004 | 0.095 | 0.352 | 0.037 | 0.039 |
| Sweden                      | Greece                       | 0.151  | -1.426 | 0.037 | 0.007 | 0.744 | 0.671 | 0.307 | 0.010 | 0.037 | 0.039 |
| State of Pernambuco         | Romania                      | -0.308 | 1.766  | 0.038 | 0.978 | 0.839 | 0.167 | 0.129 | 0.010 | 0.038 | 0.039 |
| Italy                       | Bahrain                      | 0.390  | 1.342  | 0.038 | 0.001 | 0.885 | 0.087 | 0.808 | 0.081 | 0.038 | 0.040 |
| Libya                       | Belarus                      | 0.091  | 0.102  | 0.038 | 0.000 | 0.149 | 0.154 | 0.423 | 0.010 | 0.038 | 0.040 |
| State of Roraima            | State of Piauí               | -1.309 | -2.237 | 0.039 | 0.030 | 0.684 | 0.178 | 0.707 | 0.010 | 0.039 | 0.040 |
| State of Roraima            | State of Bahia               | -1.277 | -2.719 | 0.040 | 0.046 | 0.659 | 0.180 | 0.983 | 0.010 | 0.040 | 0.042 |
| State of Tocantins          | State of Mato Grosso         | -0.678 | 2.702  | 0.040 | 0.019 | 0.871 | 0.051 | 0.198 | 0.010 | 0.040 | 0.042 |
| State of Mato Grosso        | Kuwait                       | 2.146  | 0.989  | 0.040 | 0.033 | 0.285 | 0.344 | 0.677 | 0.010 | 0.040 | 0.042 |
| Greece                      | Finland                      | 0.066  | -0.433 | 0.040 | 0.020 | 0.111 | 0.743 | 0.867 | 0.010 | 0.040 | 0.042 |
| State of Pará               | New York                     | 0.284  | 11.976 | 0.041 | 0.020 | 0.715 | 0.009 | 0.109 | 0.213 | 0.041 | 0.042 |
| Luxembourg                  | Czech Republic               | -0.127 | 0.692  | 0.041 | 0.955 | 0.384 | 0.500 | 0.518 | 0.018 | 0.041 | 0.042 |
| Spain                       | Luxembourg                   | -0.143 | -3.740 | 0.042 | 0.773 | 0.394 | 0.842 | 0.061 | 0.010 | 0.042 | 0.043 |
| State of Tocantins          | Qatar                        | 1.554  | 0.469  | 0.042 | 0.251 | 0.569 | 0.567 | 0.308 | 0.010 | 0.042 | 0.044 |
| Moldova                     | Berlin                       | 0.463  | 0.871  | 0.043 | 0.229 | 0.554 | 0.204 | 0.500 | 0.010 | 0.043 | 0.045 |
| State of Roraima            | Lebanon                      | 0.675  | -2.501 | 0.043 | 0.047 | 0.615 | 0.419 | 0.804 | 0.010 | 0.043 | 0.045 |
| State of Roraima            | State of Rondônia            | -0.846 | -2.539 | 0.043 | 0.174 | 0.577 | 0.045 | 0.465 | 0.010 | 0.043 | 0.045 |
| Israel                      | Austria                      | 0.715  | -0.452 | 0.043 | 0.464 | 0.793 | 0.423 | 0.363 | 0.038 | 0.043 | 0.045 |
| Saudi Arabia                | Austria                      | 0.304  | -0.257 | 0.044 | 0.213 | 0.192 | 0.149 | 0.163 | 0.056 | 0.044 | 0.046 |
| Tokyo - JP                  | Kuwait                       | -0.056 | 0.158  | 0.044 | 0.195 | 0.003 | 0.980 | 0.006 | 0.015 | 0.044 | 0.046 |
| Japan                       | Belarus                      | -0.108 | 0.056  | 0.045 | 0.591 | 0.717 | 0.040 | 0.448 | 0.010 | 0.045 | 0.047 |
| Kuwait                      | Croatia                      | -0.021 | 0.226  | 0.045 | 0.239 | 0.001 | 0.768 | 0.004 | 0.010 | 0.045 | 0.047 |
| State of Paraíba            | State of Ceará               | 0.934  | -5.814 | 0.045 | 0.109 | 0.375 | 0.547 | 0.242 | 0.010 | 0.045 | 0.047 |
| State of Tocantins          | Romania                      | 0.799  | 0.683  | 0.045 | 0.660 | 0.542 | 0.861 | 0.285 | 0.010 | 0.045 | 0.047 |
| Qatar                       | Belarus                      | -0.159 | 0.215  | 0.045 | 0.296 | 0.588 | 0.070 | 0.926 | 0.010 | 0.045 | 0.048 |
| Tokyo - JP                  | Manaus                       | -0.734 | -2.300 | 0.045 | 0.018 | 0.667 | 0.737 | 0.301 | 0.010 | 0.045 | 0.048 |
| Kuwait                      | Bosnia and Herzegovina       | -0.666 | 0.305  | 0.046 | 0.765 | 0.295 | 0.447 | 0.176 | 0.027 | 0.046 | 0.048 |
| United Kingdom              | Berlin                       | -0.521 | 2.451  | 0.046 | 0.002 | 0.208 | 0.112 | 0.019 | 0.088 | 0.046 | 0.048 |
| Serbia                      | Manaus                       | -0.315 | 2.802  | 0.046 | 0.090 | 0.042 | 0.491 | 0.026 | 0.010 | 0.046 | 0.048 |
| State of Mato Grosso        | State of Alagoas             | 1.188  | 3.714  | 0.046 | 0.587 | 0.386 | 0.182 | 0.579 | 0.010 | 0.046 | 0.049 |
| State of Roraima            | State of Rio Grande do Norte | -1.045 | -2.342 | 0.046 | 0.743 | 0.660 | 0.037 | 0.854 | 0.010 | 0.046 | 0.049 |
| Kuwait                      | Costa Rica                   | -0.270 | 0.207  | 0.046 | 0.320 | 0.047 | 0.945 | 0.079 | 0.010 | 0.046 | 0.049 |
| State of Pará               | Greece                       | -0.102 | 1.738  | 0.047 | 0.864 | 0.395 | 0.052 | 0.008 | 0.067 | 0.047 | 0.049 |
| State of Sergipe            | State of Pernambuco          | 0.204  | 5.696  | 0.047 | 0.038 | 0.450 | 0.532 | 0.309 | 0.010 | 0.047 | 0.050 |
| United Arab Emirates        | Oman                         | -0.344 | 0.368  | 0.047 | 0.998 | 0.112 | 0.292 | 0.132 | 0.010 | 0.047 | 0.050 |
