# Supplementary material for: RETRACTED ARTICLE: Stay-at-home policy is a case of exception fallacy: an internet-based ecological study
Source: Springer Nature journal article supplement (doi:10.1038/s41598-021-84092-1), 2021-03-05
Supplement: 41598_2021_84092_MOESM2_ESM.pdf [file 41598_2021_84092_MOESM2_ESM.pdf]

**Table S2.** Comparison between 63 countries and regions displaying a significant association between the variation of number of deaths/million and the variation of the percentage of staying at home, after False Discovery Rate (FDR B-H) analysis. Intercept and the coef\_isolation  $\beta_0$  and  $\beta_1$  are from the linear regression formula; Shapiro is the test for normality; white is the test for heteroskedasticity; LM is the Lagrange Multiplier test for autocorrelation, Reset is the Ramsey's RESET test for functional specification (all should have a p-value  $\geq 0.05$  for a valid comparison), Coit=the p-value of the Phillips-Perron test applied to the residual of the regression (for a valid comparison, p-value $<0.05$ ).

| #  | Region A                    | Region B                | intercept | coef_isol | P-value (RStudio) Shapiro | White | L.M. test | Reset | Coit  | p-value (Python) | FDR B-H |       |
|----|-----------------------------|-------------------------|-----------|-----------|---------------------------|-------|-----------|-------|-------|------------------|---------|-------|
| 1  | Turkey                      | Sweden                  | -0.096    | -1.526    | 0.002                     | 0.095 | 0.693     | 0.429 | 0.574 | 0.010            | 0.002   | 0.002 |
| 2  | Qatar                       | Moldova                 | -0.241    | -0.515    | 0.002                     | 0.726 | 0.734     | 0.901 | 0.488 | 0.010            | 0.002   | 0.002 |
| 3  | Kuwait                      | Israel                  | -0.591    | -0.369    | 0.004                     | 0.085 | 0.957     | 0.943 | 0.074 | 0.021            | 0.004   | 0.004 |
| 4  | Saudi Arabia                | Oman                    | -0.095    | 0.327     | 0.004                     | 0.093 | 0.215     | 0.926 | 0.181 | 0.010            | 0.004   | 0.004 |
| 5  | Belarus                     | Australia               | 0.023     | 0.117     | 0.004                     | 0.185 | 0.661     | 0.154 | 0.923 | 0.010            | 0.004   | 0.004 |
| 6  | Turkey                      | Oman                    | -0.190    | 0.372     | 0.005                     | 0.620 | 0.353     | 0.206 | 0.225 | 0.010            | 0.005   | 0.005 |
| 7  | Sweden                      | Australia               | -1.036    | -2.432    | 0.005                     | 0.073 | 0.852     | 0.477 | 0.197 | 0.010            | 0.005   | 0.005 |
| 8  | Sweden                      | Macedonia               | -0.326    | -2.268    | 0.005                     | 0.332 | 0.893     | 0.322 | 0.174 | 0.010            | 0.005   | 0.005 |
| 9  | State of Roraima            | State of Amapá          | -0.628    | -4.023    | 0.005                     | 0.230 | 0.078     | 0.137 | 0.784 | 0.010            | 0.005   | 0.005 |
| 10 | State of Minas Gerais       | Kuwait                  | 1.037     | 0.451     | 0.006                     | 0.080 | 0.871     | 0.285 | 0.084 | 0.010            | 0.006   | 0.006 |
| 11 | Romania                     | Finland                 | 0.664     | -0.684    | 0.006                     | 0.090 | 0.062     | 0.074 | 0.931 | 0.010            | 0.006   | 0.006 |
| 12 | Tokyo - JP                  | Japan                   | 0.013     | 0.221     | 0.007                     | 0.309 | 0.757     | 0.852 | 0.679 | 0.010            | 0.007   | 0.007 |
| 13 | Sweden                      | State of Roraima        | -1.016    | -3.702    | 0.007                     | 0.255 | 0.726     | 0.872 | 0.257 | 0.010            | 0.007   | 0.008 |
| 14 | Serbia                      | Kuwait                  | 0.187     | 0.330     | 0.008                     | 0.741 | 0.708     | 0.784 | 0.134 | 0.010            | 0.008   | 0.008 |
| 15 | United Kingdom              | State of Alagoas        | -0.730    | 4.025     | 0.008                     | 0.157 | 0.802     | 0.171 | 0.132 | 0.031            | 0.008   | 0.009 |
| 16 | State of Roraima            | Bahrain                 | -0.852    | -3.800    | 0.009                     | 0.060 | 0.691     | 0.497 | 0.153 | 0.010            | 0.009   | 0.009 |
| 17 | Slovenia                    | Luxembourg              | 0.148     | 0.886     | 0.009                     | 0.384 | 0.338     | 0.257 | 0.867 | 0.037            | 0.009   | 0.009 |
| 18 | State of Mato Grosso        | Belarus                 | 1.627     | 0.918     | 0.010                     | 0.286 | 0.683     | 0.467 | 0.290 | 0.024            | 0.010   | 0.010 |
| 19 | State of Pará               | Serbia                  | -0.295    | 2.095     | 0.011                     | 0.438 | 0.349     | 0.117 | 0.063 | 0.038            | 0.011   | 0.011 |
| 20 | South Korea                 | Belarus                 | -0.118    | 0.093     | 0.011                     | 0.778 | 0.675     | 0.160 | 0.432 | 0.010            | 0.011   | 0.011 |
| 21 | Sweden                      | Costa Rica              | -1.394    | -1.514    | 0.011                     | 0.233 | 0.684     | 0.973 | 0.215 | 0.010            | 0.011   | 0.011 |
| 22 | Lebanon                     | Belarus                 | -0.010    | 0.105     | 0.011                     | 0.984 | 0.204     | 0.817 | 0.931 | 0.010            | 0.011   | 0.012 |
| 23 | Kuwait                      | Belarus                 | -0.083    | 0.200     | 0.011                     | 0.082 | 0.056     | 0.457 | 0.398 | 0.010            | 0.011   | 0.012 |
| 24 | State of Roraima            | State of Pará           | -0.295    | -3.512    | 0.013                     | 0.166 | 0.318     | 0.855 | 0.839 | 0.010            | 0.013   | 0.013 |
| 25 | State of Rio Grande do Sul  | Belarus                 | 1.367     | -0.276    | 0.013                     | 0.783 | 0.169     | 0.128 | 0.874 | 0.029            | 0.013   | 0.014 |
| 26 | United Kingdom              | State of Amapá          | -0.826    | 4.568     | 0.013                     | 0.162 | 0.663     | 0.160 | 0.678 | 0.010            | 0.013   | 0.014 |
| 27 | State of Alagoas            | Greece                  | 0.467     | 0.698     | 0.016                     | 0.167 | 0.492     | 0.079 | 0.166 | 0.021            | 0.016   | 0.017 |
| 28 | State of Alagoas            | Bosnia and Herzegovina  | -0.302    | 1.364     | 0.018                     | 0.526 | 0.902     | 0.318 | 0.145 | 0.010            | 0.018   | 0.018 |
| 29 | State of Roraima            | State of Acre           | -1.022    | -3.392    | 0.019                     | 0.844 | 0.113     | 0.056 | 0.945 | 0.010            | 0.019   | 0.019 |
| 30 | State of Mato Grosso do Sul | Kuwait                  | 1.604     | 0.498     | 0.019                     | 0.173 | 0.109     | 0.771 | 0.096 | 0.010            | 0.019   | 0.020 |
| 31 | Costa Rica                  | Austria                 | 0.665     | -0.334    | 0.019                     | 0.836 | 0.402     | 0.126 | 0.174 | 0.040            | 0.019   | 0.020 |
| 32 | State of Alagoas            | Croatia                 | 0.445     | 0.904     | 0.020                     | 0.167 | 0.756     | 0.261 | 0.173 | 0.011            | 0.020   | 0.021 |
| 33 | State of Sergipe            | Hungary                 | 0.890     | 1.841     | 0.020                     | 0.798 | 0.988     | 0.931 | 0.671 | 0.010            | 0.020   | 0.021 |
| 34 | State of Roraima            | Chile                   | -1.408    | -2.313    | 0.022                     | 0.169 | 0.220     | 0.076 | 0.412 | 0.010            | 0.022   | 0.022 |
| 35 | United Kingdom              | State of Sergipe        | -0.853    | 3.689     | 0.022                     | 0.350 | 0.925     | 0.191 | 0.186 | 0.042            | 0.022   | 0.023 |
| 36 | United Kingdom              | State of Paraíba        | -1.209    | 3.576     | 0.023                     | 0.128 | 0.919     | 0.264 | 0.210 | 0.023            | 0.023   | 0.024 |
| 37 | Turkey                      | State of Tocantins      | -1.335    | 0.554     | 0.026                     | 0.201 | 0.396     | 0.834 | 0.345 | 0.010            | 0.026   | 0.027 |
| 38 | State of Tocantins          | Serbia                  | 1.194     | 0.644     | 0.026                     | 0.411 | 0.467     | 0.483 | 0.831 | 0.010            | 0.026   | 0.027 |
| 39 | State of Roraima            | State of Pernambuco     | -0.774    | -2.903    | 0.026                     | 0.084 | 0.308     | 0.069 | 0.891 | 0.010            | 0.026   | 0.027 |
| 40 | State of Rondônia           | Oman                    | 0.697     | 1.559     | 0.026                     | 0.101 | 0.801     | 0.086 | 0.179 | 0.010            | 0.026   | 0.027 |
| 41 | State of Santa Catarina     | State of Espírito Santo | -0.005    | 2.089     | 0.029                     | 0.779 | 0.052     | 0.862 | 0.614 | 0.010            | 0.029   | 0.030 |
| 42 | State of Pernambuco         | Serbia                  | 0.105     | 1.465     | 0.029                     | 0.482 | 0.777     | 0.114 | 0.585 | 0.010            | 0.029   | 0.030 |
| 43 | South Korea                 | Greece                  | -0.054    | 0.067     | 0.031                     | 0.157 | 0.951     | 0.063 | 0.324 | 0.010            | 0.031   | 0.032 |
| 44 | State of São Paulo          | State of Paraná         | 0.330     | 1.946     | 0.032                     | 0.832 | 0.151     | 0.621 | 0.676 | 0.010            | 0.032   | 0.034 |
| 45 | State of Mato Grosso        | Qatar                   | 2.049     | 1.034     | 0.032                     | 0.135 | 0.728     | 0.764 | 0.557 | 0.010            | 0.032   | 0.034 |
| 46 | State of Mato Grosso        | Hungary                 | 1.924     | 1.276     | 0.033                     | 0.256 | 0.949     | 0.264 | 0.417 | 0.010            | 0.033   | 0.034 |
| 47 | Sweden                      | Serbia                  | 0.038     | -1.383    | 0.033                     | 0.197 | 0.921     | 0.565 | 0.598 | 0.010            | 0.033   | 0.034 |
| 48 | Moldova                     | Luxembourg              | 0.504     | 0.884     | 0.034                     | 0.546 | 0.658     | 0.861 | 0.480 | 0.010            | 0.034   | 0.036 |
| 49 | State of Pará               | State of Mato Grosso    | -1.303    | 4.673     | 0.035                     | 0.673 | 0.620     | 0.506 | 0.245 | 0.023            | 0.035   | 0.037 |
| 50 | Romania                     | Berlin                  | 0.599     | 0.504     | 0.037                     | 0.772 | 0.124     | 0.203 | 0.433 | 0.010            | 0.037   | 0.038 |
| 51 | State of Pará               | Bosnia and Herzegovina  | -0.876    | 2.634     | 0.037                     | 0.631 | 0.647     | 0.100 | 0.103 | 0.049            | 0.037   | 0.039 |
| 52 | State of Pernambuco         | Romania                 | -0.308    | 1.766     | 0.038                     | 0.978 | 0.839     | 0.167 | 0.129 | 0.010            | 0.038   | 0.039 |
| 53 | Luxembourg                  | Czech Republic          | -0.127    | 0.692     | 0.041                     | 0.955 | 0.384     | 0.500 | 0.518 | 0.018            | 0.041   | 0.042 |
| 54 | Spain                       | Luxembourg              | -0.143    | -3.740    | 0.042                     | 0.773 | 0.394     | 0.842 | 0.061 | 0.010            | 0.042   | 0.043 |
| 55 | State of Tocantins          | Qatar                   | 1.554     | 0.469     | 0.042                     | 0.251 | 0.569     | 0.567 | 0.308 | 0.010            | 0.042   | 0.044 |
| 56 | Moldova                     | Berlin                  | 0.463     | 0.871     | 0.043                     | 0.229 | 0.554     | 0.204 | 0.500 | 0.010            | 0.043   | 0.045 |
| 57 | Israel                      | Austria                 | 0.715     | -0.452    | 0.043                     | 0.464 | 0.793     | 0.423 | 0.363 | 0.038            | 0.043   | 0.045 |
| 58 | State of Paraíba            | State of Ceará          | 0.934     | -5.814    | 0.045                     | 0.109 | 0.375     | 0.547 | 0.242 | 0.010            | 0.045   | 0.047 |
| 59 | State of Tocantins          | Romania                 | 0.799     | 0.683     | 0.045                     | 0.660 | 0.542     | 0.861 | 0.285 | 0.010            | 0.045   | 0.047 |
| 60 | Qatar                       | Belarus                 | -0.159    | 0.215     | 0.045                     | 0.296 | 0.588     | 0.070 | 0.926 | 0.010            | 0.045   | 0.048 |
| 61 | Kuwait                      | Bosnia and Herzegovina  | -0.666    | 0.305     | 0.046                     | 0.765 | 0.295     | 0.447 | 0.176 | 0.027            | 0.046   | 0.048 |
| 62 | State of Mato Grosso        | State of Alagoas        | 1.188     | 3.714     | 0.046                     | 0.587 | 0.386     | 0.182 | 0.579 | 0.010            | 0.046   | 0.049 |
| 63 | United Arab Emirates        | Oman                    | -0.344    | 0.368     | 0.047                     | 0.998 | 0.112     | 0.292 | 0.132 | 0.010            | 0.047   | 0.050 |
