# Supplementary material for: RETRACTED ARTICLE: Stay-at-home policy is a case of exception fallacy: an internet-based ecological study
Source: Springer Nature journal article supplement (doi:10.1038/s41598-021-84092-1), 2021-03-05

**Figure S1.** Characteristics of the time series data on new daily deaths/million in the city of São Paulo over 187 days. Note the non-stationary time series pattern.

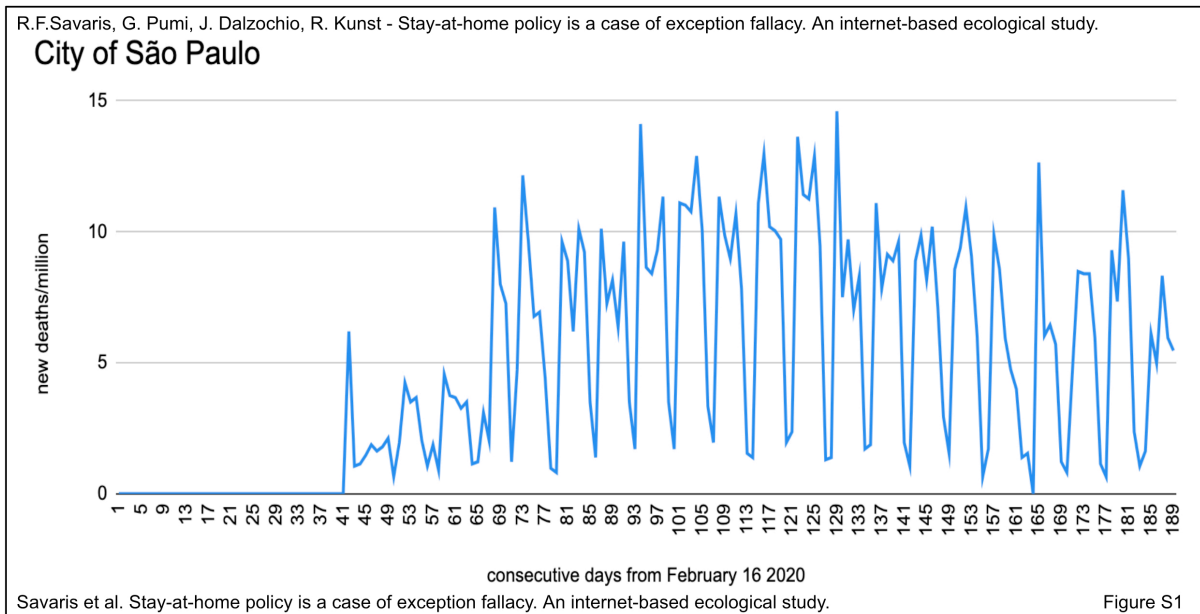

**Figure S2.** Data aggregation of the number of deaths/million in the city of São Paulo and in Argentina over several epidemiological weeks, compared to the percentage of staying at home.

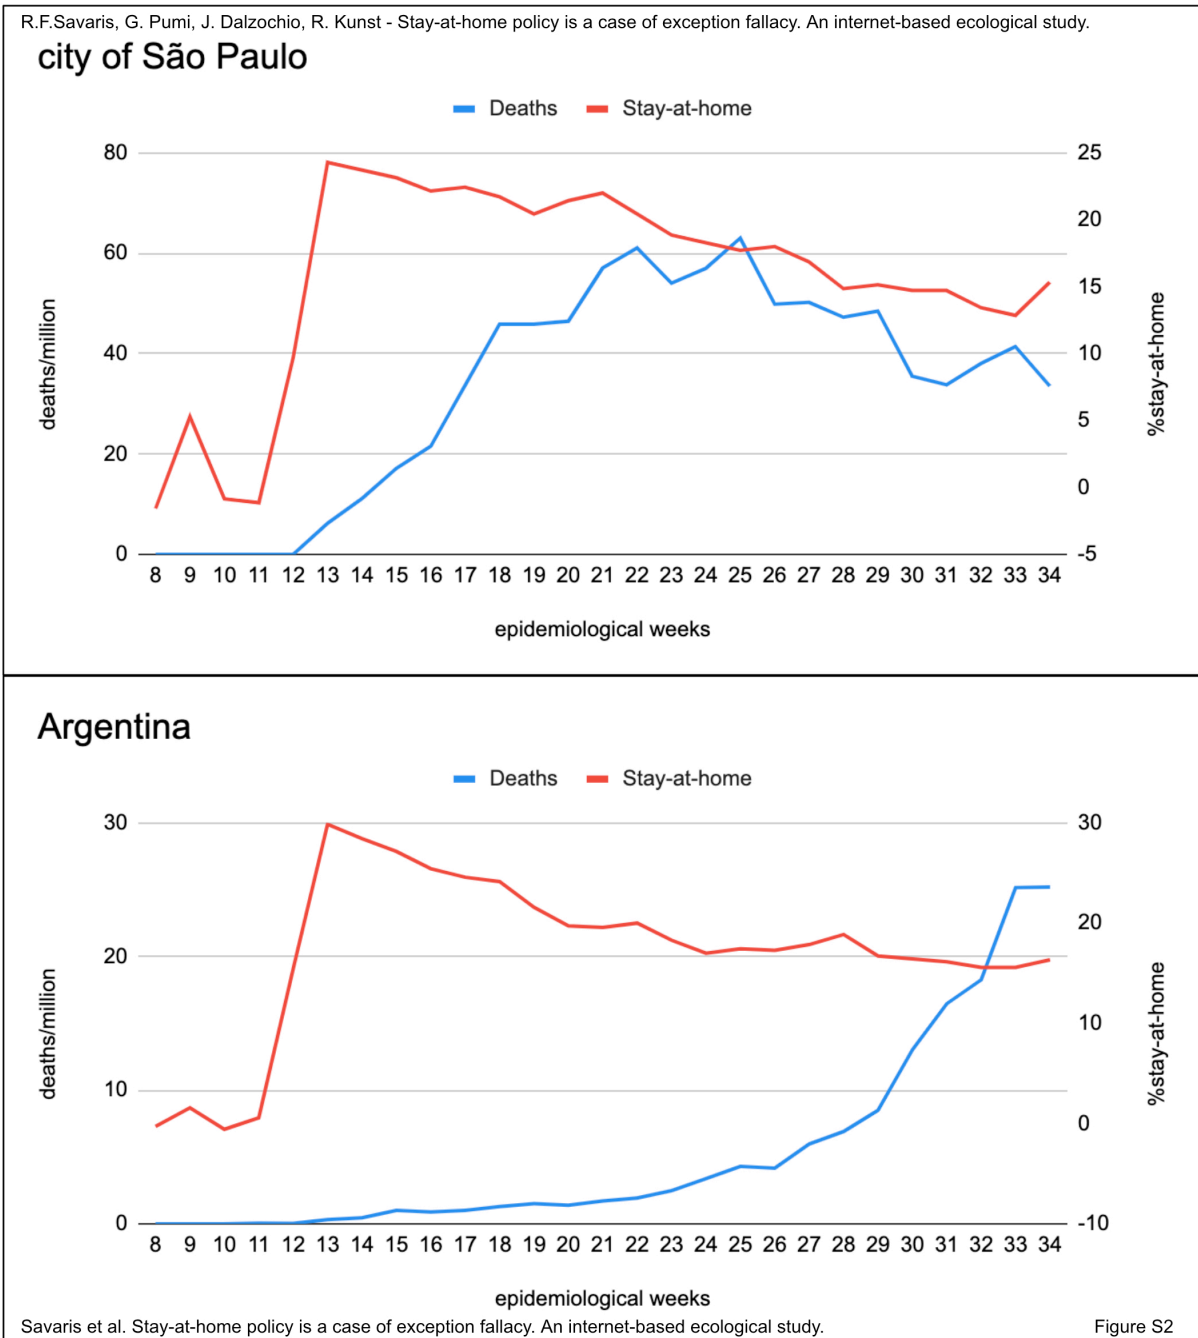

**Figure S3.** Examples of a controlled and not controlled country for cases of COVID-19

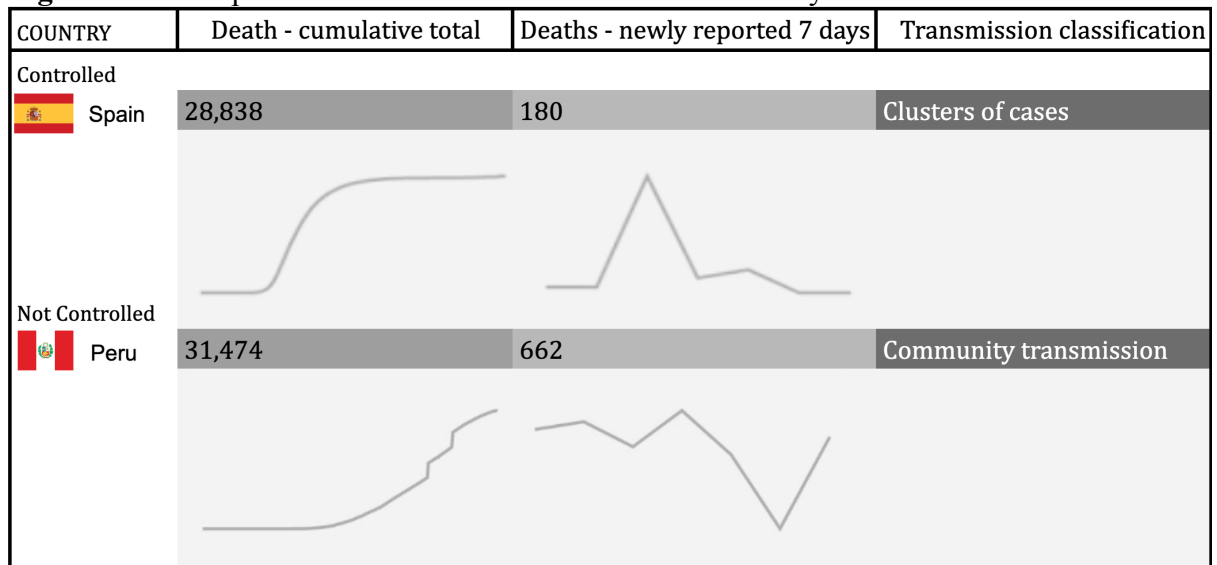

Supplement: 41598_2021_84092_MOESM3_ESM.pdf [file 41598_2021_84092_MOESM3_ESM.pdf]
